1 **Nanopore-based single molecule sequencing of the D4Z4 array**  
2 **responsible for facioscapulohumeral muscular dystrophy**

3

4 Satomi Mitsuhashi<sup>1,2</sup>, So Nakagawa<sup>1,3</sup>, Mahoko Ueda<sup>1,3</sup>, Tadashi Imanishi<sup>1</sup>,  
5 Hiroaki Mitsuhashi<sup>4</sup>

6

7 1. Biomedical Informatics Laboratory, Department of Molecular Life Science,  
8 Tokai University School of Medicine, Isehara, Kanagawa 259-1193, Japan

9 2. Department of Human Genetics, Yokohama City University  
10 Graduate School of Medicine, Yokohama, Kanagawa 236-0004, Japan

11 3. Micro/Nano Technology Center, Tokai University, Hiratsuka, Kanagawa,  
12 Japan

13 4. Department of Applied Biochemistry, School of Engineering, Tokai  
14 University, Hiratsuka, Kanagawa, Japan

15

16 **Corresponding author**

17 Satomi Mitsuhashi

18 Department of Human Genetics Yokohama City University Graduate School of  
19 Medicine, Yokohama, Kanagawa 236-0004, Japan

20 Tel. +81-45-787-2606

21 Fax. +81-45-786-5219

22 E-mail: [satomits@yokohama-cu.ac.jp](mailto:satomits@yokohama-cu.ac.jp)

23

24

25 **Abstract**

26 Subtelomeric macrosatellite repeats are difficult to sequence using conventional  
27 sequencing methods owing to the high similarity among repeat units and high  
28 GC content. Sequencing these repetitive regions is challenging, even with  
29 recent improvements in sequencing technologies. Among these repeats, a  
30 haplotype of the telomeric sequence and shortening of the D4Z4 array on  
31 human chromosome 4q35 causes one of the most prevalent forms of muscular  
32 dystrophy with autosomal-dominant inheritance, facioscapulohumeral muscular  
33 dystrophy (FSHD). Here, we applied a nanopore-based ultra-long read  
34 sequencer to sequence a BAC clone containing 13 D4Z4 repeats and flanking  
35 regions. We successfully obtained the whole D4Z4 repeat sequence, including  
36 the pathogenic gene *DUX4* in the last D4Z4 repeat. The estimated sequence  
37 accuracy of the total repeat region was 99.7% based on a comparison with the  
38 reference sequence. Errors were typically observed between purine or between  
39 pyrimidine bases. Further, we analyzed the D4Z4 sequence from publicly  
40 available ultra-long whole human genome sequencing data obtained by  
41 nanopore sequencing. This technology may become a new standard for the  
42 molecular diagnosis of FSHD in the future and has the potential to widen our  
43 understanding of subtelomeric regions.

44

45 **Introduction**

46 Facioscapulohumeral muscular dystrophy (FSHD) is one of the most  
47 prevalent adult-onset muscular dystrophies. The genomes of most patients with  
48 FSHD have a common feature, i.e., a contracted subtelomeric macrosatellite

49 repeat array called D4Z4 on chromosome 4q35. The D4Z4 array consists of a  
50 highly similar 3.3-kb single repeat unit. Normally, the D4Z4 array is highly  
51 methylated and forms heterochromatin. Patients with FSHD have less than 11  
52 D4Z4 repeats (1-3). In Japan, the majority of patients with FSHD have less than  
53 7 repeats (4). Shortening of the D4Z4 array causes the de-repression of the  
54 flanking genes as well as *DUX4*, located in the last D4Z4 repeat. The ectopic  
55 expression of *DUX4* is toxic in muscle tissues and is thought to be a causal  
56 factor for FSHD (5-9). In addition to the repeat number, the haplotype of the last  
57 D4Z4 repeat is important for the development of FSHD (1, 2). The telomeric  
58 flanking region of D4Z4 contains the 3' UTR of *DUX4* and is called the pLAM  
59 region. The presence of a polyadenylation signal in this region allows *DUX4*  
60 expression and disease manifestation (10). In contrast, individuals without  
61 polyadenylation signals do not manifest the disease (2).

62           Molecular diagnosis of FSHD is commonly made by Southern blotting  
63 of genomic DNA after restriction enzyme digestion to measure the D4Z4 array  
64 length and estimate the number of repeats. Haplotype analysis requires a  
65 different probe (1). Sequencing of this D4Z4 array using Sanger sequencing or  
66 short-read sequencers (up to 600 bp for Illumina and IonTorrent) is technically  
67 difficult owing to the high similarity and the high GC content of the repeats. The  
68 Oxford Nanopore Technologies MinION (Oxford, UK) is a single-molecule  
69 sequencer that can produce long reads exceeding 100 kbp (11). Therefore,  
70 MinION sequencing may enable the determination of pathogenicity by  
71 sequencing the complete D4Z4 array.

72

## 73 **Results**

### 74 **Nanopore-based D4Z4 sequencing using a BAC clone**

75           The D4Z4 array on 4q35 has *EcoRI* sites in its flanking region. We  
76 took advantage of this restriction enzyme to excise the full-length D4Z4 repeats  
77 with flanking sequences, for a total of 49,877 bp. Both sides of the *EcoRI*-  
78 digested DNA fragment had unique sequences that are not found in the D4Z4  
79 repeats (4,823 bp on centromeric side and 865 bp on the telomeric side). RP11-  
80 242C23 contained multiple *EcoRI* sites. pBACe3.6 vector-derived DNA was  
81 digested, yielding fragments of less than 10 kb (Figure 1a). We were able to  
82 easily separate the D4Z4-containing DNA fragment (49877 bp) from vector-  
83 derived DNA by agarose gel electrophoresis and gel extraction (Figure 1b). We  
84 extracted the D4Z4 array-containing DNA and subjected it to MinION 1D  
85 sequencing (Oxford Nanopore Technologies, Oxford, UK). Base-calling was  
86 initially performed using MinKNOW ver. 1.5.12 and fastq conversion was  
87 performed using poretools to obtain 20,761 reads (12). Base-calling was not  
88 possible for 87,410 reads using real-time MinKNOW basecaller probably due to  
89 out of computer memory; we used Albacore (v.1.1.0) to obtain the fastq  
90 sequences in these cases. A total of 128,171 reads were obtained, with an  
91 average read length of 7,577 bp (Supplemental Table 1).

92           We mapped the reads to the reference BAC clone sequence  
93 (GenBank accession number CT476828.7) using LAST (13). Visualization of  
94 mapped reads using IGV showed coverage of the whole D4Z4 array (Figure 2).  
95 The longest read mapped to the D4Z4 repeat was 29,060 bp. The consensus  
96 sequence had an accuracy of 99.72%. We also used BWA-MEM for mapping

97 and found that the consensus sequence had a lower accuracy (99.18%). Thus,  
98 we used LAST for subsequent analyses.

99           The haplotype of the telomeric flanking region of the final D4Z4 repeat  
100 known as pLAM is important for disease manifestation. There are two equally  
101 common haplotypes, A and B. Haplotype A has an added polyadenylation signal  
102 at the 3' UTR of the *DUX4* gene(10). This polyadenylation signal allows the  
103 ectopic expression of *DUX4*, which is toxic in muscle cells of patients with  
104 FSHD with the contracted D4Z4 array (14). Haplotype B lacks homologous  
105 sequence to pLAM. Individuals with haplotype B do not manifest the disease,  
106 despite having the contracted D4Z4 allele. Thus, it is important to identify the  
107 pLAM sequence for the molecular diagnosis of FSHD. Using MinION, we  
108 successfully sequenced the whole pLAM region with an accuracy of 100%  
109 (Figure 3). In total, 135 bases were different from the reference genome  
110 sequence among the whole D4Z4 array sequence of 49,877 bp (0.27%)  
111 (Supplemental Figure 1a). Among 135 bases, 115 (85.2%) substitutions were  
112 between purines or between pyrimidines (Supplemental Figure 1b). Most of  
113 these errors were repeatedly detected at the same position in the repeats  
114 (indicated by asterisks in Supplemental Figure 1a). Interestingly, 16 out of 18  
115 recurrent errors were seen in the CCXGG sequence at the X position.

116           We also compared the nanopore-sequenced *DUX4* open-reading  
117 frame (ORF) to the reference and the Sanger sequencing results for the  
118 subcloned *DUX4* ORF. The accuracy of the *DUX4* ORF sequence was 99.9%  
119 (Supplemental Figure 2) and there were 3 errors. These errors were also  
120 located in the X position in the CCXGG sequence.

121

## 122 **D4Z4 detection using nanopore-based whole human genome sequencing**

123 We tested whether we can identify the D4Z4 array from whole genome  
124 sequencing data obtained from the MinION sequencer. We used the publicly  
125 available human reference standard genome NA12878 with R9.4 chemistry  
126 (11). This project contains two sets of data. The rel3 dataset had approximately  
127 26x coverage with an N50 length of 10.6 kb. Rel4 had 5x coverage of ultra-long  
128 reads with an N50 of 99.7 kb, indicating that rel4 contained reads that possibly  
129 cover the whole D4Z4 region. We performed a blastn similarity search against  
130 rel4 reads using the pLAM region as a query and obtained 18 hits (e-value =  
131 0.0). These reads were aligned to the D4Z4 repeat reference sequence with the  
132 pLAM region. The consensus sequence identity to the last D4Z4 repeat and the  
133 pLAM region was 96.3% (Figure 4). Among 18 reads, 2 had homologous  
134 sequences to both centromeric and telomeric flanking regions of D4Z4 (Figure  
135 2, Supplemental Table 2). These two reads are expected to cover the whole  
136 D4Z4 array, which usually includes more than 16 D4Z4 repeats. Although, we  
137 could not determine the exact number of D4Z4 repeats owing to the high rate of  
138 deletion errors, this range of read fragment is capable of detecting contracted  
139 D4Z4 array which is seen in the most of the FSHD patients.

140

141

## 142 **Discussion**

143 Sequencing a highly repetitive subtelomeric region is extremely  
144 challenging. There is variation in the number of repeats among individuals and

145 sometimes within individuals, i.e., somatic mosaicism. It has been reported that  
146 subtelomeric regions form heterochromatin, functioning as an insulator or  
147 repressor of near-by genes or preventing telomere shortening (15, 16). It is  
148 important to determine the relationship between phenotypic differences and  
149 either sequence or structural variation in repeats not only to decipher the  
150 pathomechanisms of the disease, but also to obtain a deeper understanding of  
151 human genomes. Here, we applied a nanopore-based sequencer to investigate  
152 the subtelomeric repeat array associated with FSHD for the first time. In the  
153 near future, it will be feasible to search for these sequence-difficult regions to  
154 find causal relationships between the human genome and genetic diseases;  
155 even given the prevailing use of high-throughput sequencing of coding regions,  
156 the genetic causes of many diseases remain unsolved.

157         The disease locus of FSHD was identified at 4q35 more than 20 years  
158 ago; however, the mechanism underlying the disease has been a mystery for  
159 years and the causative genes have not been identified until recently, when  
160 accumulating evidence has shown that the misexpression of *DUX4* is  
161 associated with the disease. Further, it is still unclear whether there is any  
162 sequence polymorphism in the *DUX4* gene or flanking regions, as it is difficult to  
163 sequence the gene or the *DUX4* transcript, which is expressed at the very low  
164 levels even in the muscle tissues of patients (14, 17). Since therapeutic  
165 approaches including nucleic acid drugs targeting *DUX4* mRNA are being  
166 studied (18, 19), it may be useful to determine the exact *DUX4* sequence of  
167 patients for the development of effective therapies as well as an integrative  
168 diagnostic method.

169           Currently, the number of D4Z4 repeats is usually determined by  
170 Southern blotting using a probe that hybridizes to the centromeric flanking  
171 sequence, p13E-11 (1). If the patient has a deletion at this probe site, it is not  
172 possible to detect the D4Z4 repeat by Southern blotting. The Southern blotting  
173 technique is complicated and time-consuming. Alternative methods have been  
174 investigated, but are not widely used (4, 20).

175           Morioka et al. sequenced D4Z4 using the PacBio sequencer (21) and  
176 analyzed random fragments from the BAC clone. The advantage of the  
177 nanopore sequencer over the PacBio sequencer is the ultra-long read capability  
178 (11). It has the potential to obtain reads of more than 100 kbp, the approximate  
179 mean size of D4Z4 in healthy individuals. Currently, we could only obtained two  
180 reads that potentially cover all D4Z4 repeats from human genome data with 5×  
181 coverage using 14 flow-cells (11). Our estimate of the number of D4Z4 repeats  
182 was more than 16, the normal size observed in healthy individuals. As the  
183 NA12878 standard DNA originated from healthy individuals without FSHD, this  
184 repeat number is reasonable. As FSHD patients have D4Z4 number less than  
185 11, we think this ultra-long read sequencing may be usable to detect the  
186 disease-causing contracted D4Z4 array. If the data output for the MinION  
187 sequencer improves, it will be possible to obtain sequence data with better  
188 resolution. This approach is potentially applicable to subtelomeric regions of  
189 other chromosomes or even to centromere sequences.

190           In nanopore-based sequencing, changes in electric current are  
191 detected as nucleotides pass through the pore. We observed that the errors  
192 tend to occur between purines or between pyrimidines, probably because they



193 have similar chemical structures (11). In addition, we also observed that  
194 substitution errors tend to occur at the same nucleotide position across repeats  
195 (Supplemental Figure 1, asterisk). This may reflect the fact that the nanopore  
196 detects combinations of nucleotides and the specific combination CCXGG was  
197 prone to be misread. We anticipate further improvements of the base-calling  
198 algorithm, which will make MinION more beneficial for medical applications.

199           Sequencing technologies are continuously developed. During the  
200 preparation of this manuscript, the new chemistry R9.5 with the new flow-cell  
201 FLO-MIN107 was released. Considering the rapid improvements in this  
202 technique, it may not be very long before this sequencing technology is used for  
203 D4Z4 repeat analyses for patients with FSHD.

204

## 205 **Conclusions**

206           Using MinION with a R9.4 flow-cell and 1D sequencing chemistry, we  
207 successfully sequenced the complete *EcoRI*-digested D4Z4 array from a BAC  
208 clone that contained the D4Z4 repeat region of human chromosome 4. Our  
209 deep sequencing results had an accuracy of 99.8% for the whole D4Z4 array  
210 and flanking region. This includes the pLAM region, with an accuracy of 100%,  
211 and the whole ORF of the pathogenic gene *DUX4*, with the accuracy of 99.9%,  
212 which are important regions for determining the pathogenesis. This short report  
213 may provide a basis for the future use of nanopore sequencing to deepen our  
214 understanding of highly heterogenous subtelomeric regions that may contribute  
215 to human disease.

216

217 **Materials and Methods**

218 **BAC clone**

219 The RP11-242C23 human BAC clone was obtained from BAC PAC Resources  
220 Center (<https://bacpaacresources.org>). This BAC clone was sequenced and  
221 deposited at GenBank under accession number CT476828.7 by the Wellcome  
222 Trust Sanger Institute. It contained 13 3306-bp D4Z4 repeats.

223

224 **Preparation of D4Z4 repeats from the BAC clone**

225 RP11-242C23 was digested using EcoRI and treated with Klenow Fragment  
226 DNA Polymerase (Takara, Shiga, Japan) at 37°C for 20 min. DNA was  
227 subjected to electrophoresis on a 0.5% agarose gel. Bands larger than the 10-  
228 kb marker (GeneRuler 1kb DNA Ladder; Thermo Fisher Scientific, Waltham,  
229 MA, USA) were excised using a razor under ultraviolet light. The DNA  
230 fragments larger than 1 kb were subjected to phenol-chloroform DNA  
231 preparation. Agarose gels were soaked in phenol and incubated for 30 min at -  
232 80°C. Then, the aqueous phase was collected and phenol-chloroform DNA  
233 preparation was performed. The EcoRI-digested whole D4Z4 repeat was  
234 enriched in the DNA sample.

235

236 **MinION 1D sequencing**

237 Library preparation was performed using a SQK-LSK108 Sequencing Kit R9.4  
238 version (Oxford Nanopore Technologies, Oxford, UK) using 500 ng of DNA.  
239 MinION sequencing was performed using one FLO-MIN106 (R9.4) flow cell with  
240 the MinION MK1b sequencer (Oxford Nanopore Technologies). Base-calling

241 and fastq conversion were performed with MinKNOW ver. 1.5.12 followed by  
242 poretools or Albacore.

243

#### 244 **Sequence alignment by LAST and BWA-MEM**

245 Sequence reads were aligned to the EcoRI-digested D4Z4 repeat reference  
246 (Figure 1b, Supplemental material) using the LAST aligner (13). Sequences  
247 were also mapped to the reference genome hg19 using BWA-mem with default  
248 settings (22). Consensus sequences were obtained and sequence identity was  
249 calculated using UGENE (23). Mapped reads were visualized using IGV  
250 software (24).

251

#### 252 **Subcloning of the last D4Z4 repeat**

253 An *Escherichia coli* transformant with the RP11-242C23 human BAC clone was  
254 cultured in LB medium containing 12.5 µg/ml chloramphenicol at 37°C The  
255 human BAC clone DNA was purified using the QIAGEN Plasmid Midi Kit  
256 (Hilden, Germany) according to the “User-Developed Protocol (QP01).” Briefly,  
257 bacterial lysate from a 100-ml scale culture was passed through a QIAGEN-tip  
258 100 column. The BAC clone DNA was eluted with buffer QF prewarmed to 65°C  
259 and concentrated by isopropanol precipitation.

260

261 To obtain the DNA clone containing the last D4Z4 repeat with the pLAM region,  
262 50 ng of the purified BAC clone was used as a template for PCR with the  
263 forward primer 5'-cgcgtccggtccgtgaaattcc-3' and the reverse primer 5'-  
264 caggggatattgtgacatatctctgcac-3'. PCR was performed with PrimeSTAR GXL

265 DNA Polymerase (Takara) with the following cycling conditions: 98°C for 2 min  
266 and 30 cycles of 98°C for 10 s, 60°C for 15 s, and 68°C for 30 min. PCR  
267 products were gel-purified and cloned into a pCR blunt vector (ThermoFisher  
268 Scientific) with the Mighty Mix DNA Ligation Kit (Takara). The sequence of the  
269 resulting plasmid was confirmed by Sanger sequencing with M13 forward and  
270 M13 reverse primers.

271

272

### 273 **D4Z4 sequence analysis using the ultra-long human whole genome** 274 **sequence**

275 The human whole genome sequenced by MinION sequencers was downloaded  
276 (<https://github.com/nanopore-wgs-consortium/NA12878>) (11). A Blastn search  
277 was performed against the ultra-long read dataset, rel4, using the pLAM  
278 sequence as a query. A total of 18 sequence reads containing pLAM hits were  
279 extracted (e-value = 0.0). These extracted reads were mapped to the D4Z4  
280 reference sequence using LAST and consensus sequences for the last D4Z4  
281 and pLAM regions were obtained as described above.

282

### 283 **References**

284

- 285 1. Wijmenga C, Hewitt JE, Sandkuijl LA, Clark LN, Wright TJ, Dauwerse HG,  
286 et al. Chromosome 4q DNA rearrangements associated with  
287 facioscapulohumeral muscular dystrophy. *Nat Genet.* 1992;2(1):26-30.

- 288 2. Lemmers RJ, de Kievit P, Sandkuijl L, Padberg GW, van Ommen GJ,  
289 Frants RR, et al. Facioscapulohumeral muscular dystrophy is uniquely  
290 associated with one of the two variants of the 4q subtelomere. *Nat Genet.*  
291 2002;32(2):235-6.
- 292 3. van Deutekom JC, Wijmenga C, van Tienhoven EA, Gruter AM, Hewitt JE,  
293 Padberg GW, et al. FSHD associated DNA rearrangements are due to  
294 deletions of integral copies of a 3.2 kb tandemly repeated unit. *Hum Mol*  
295 *Genet.* 1993;2(12):2037-42.
- 296 4. Goto K, Nishino I, Hayashi YK. Rapid and accurate diagnosis of  
297 facioscapulohumeral muscular dystrophy. *Neuromuscul Disord.*  
298 2006;16(4):256-61.
- 299 5. Mitsuhashi H, Mitsuhashi S, Lynn-Jones T, Kawahara G, Kunkel LM.  
300 Expression of DUX4 in zebrafish development recapitulates  
301 facioscapulohumeral muscular dystrophy. *Hum Mol Genet.* 2013;22(3):568-  
302 77.
- 303 6. Kowaljow V, Marcowycz A, Ansseau E, Conde CB, Sauvage S, Matteotti C,  
304 et al. The DUX4 gene at the FSHD1A locus encodes a pro-apoptotic  
305 protein. *Neuromuscul Disord.* 2007;17(8):611-23.
- 306 7. Snider L, Asawachaicharn A, Tyler AE, Geng LN, Petek LM, Maves L, et al.  
307 RNA transcripts, miRNA-sized fragments and proteins produced from D4Z4  
308 units: new candidates for the pathophysiology of facioscapulohumeral  
309 dystrophy. *Hum Mol Genet.* 2009;18(13):2414-30.

- 310 8. Wallace LM, Garwick SE, Mei W, Belayew A, Coppee F, Ladner KJ, et al.  
311 DUX4, a candidate gene for facioscapulohumeral muscular dystrophy,  
312 causes p53-dependent myopathy in vivo. *Ann Neurol.* 2011;69(3):540-52.
- 313 9. Wuebbles RD, Long SW, Hanel ML, Jones PL. Testing the effects of FSHD  
314 candidate gene expression in vertebrate muscle development. *Int J Clin*  
315 *Exp Pathol.* 2010;3(4):386-400.
- 316 10. Lemmers RJ, van der Vliet PJ, Klooster R, Sacconi S, Camano P,  
317 Dauwerse JG, et al. A unifying genetic model for facioscapulohumeral  
318 muscular dystrophy. *Science.* 2010;329(5999):1650-3.
- 319 11. Jain M, Koren S, Quick J, Rand AC, Sasani TA, Tyson JR, et al. Nanopore  
320 sequencing and assembly of a human genome with ultra-long reads.  
321 *BioRxiv.* 2017. doi: <https://doi.org/10.1101/128835>
- 322 12. Loman NJ, Quinlan AR. Poretools: a toolkit for analyzing nanopore  
323 sequence data. *Bioinformatics.* 2014;30(23):3399-401.
- 324 13. Kielbasa SM, Wan R, Sato K, Horton P, Frith MC. Adaptive seeds tame  
325 genomic sequence comparison. *Genome Res.* 2011;21(3):487-93.
- 326 14. Snider L, Geng LN, Lemmers RJ, Kyba M, Ware CB, Nelson AM, et al.  
327 Facioscapulohumeral dystrophy: incomplete suppression of a  
328 retrotransposed gene. *PLoS Genet.* 2010;6(10):e1001181.
- 329 15. Ottaviani A, Rival-Gervier S, Boussouar A, Foerster AM, Rondier D,  
330 Sacconi S, et al. The D4Z4 macrosatellite repeat acts as a CTCF and A-  
331 type lamins-dependent insulator in facio-scapulo-humeral dystrophy. *PLoS*  
332 *Genet.* 2009;5(2):e1000394.

- 333 16. Stadler G, Rahimov F, King OD, Chen JC, Robin JD, Wagner KR, et al.  
334 Telomere position effect regulates DUX4 in human facioscapulohumeral  
335 muscular dystrophy. *Nat Struct Mol Biol.* 2013;20(6):671-8.
- 336 17. Jones TI, Chen JC, Rahimov F, Homma S, Arashiro P, Beermann ML, et al.  
337 Facioscapulohumeral muscular dystrophy family studies of DUX4  
338 expression: evidence for disease modifiers and a quantitative model of  
339 pathogenesis. *Hum Mol Genet.* 2012;21(20):4419-30.
- 340 18. Anseau E, Vanderplanck C, Wauters A, Harper SQ, Coppee F, Belayew A.  
341 Antisense oligonucleotides used to target the DUX4 mRNA as therapeutic  
342 approaches in facioscapulohumeral muscular dystrophy (FSHD). *Genes.*  
343 2017;8(3).
- 344 19. Wallace LM, Liu J, Domire JS, Garwick-Coppens SE, Guckes SM, Mendell  
345 JR, et al. RNA interference inhibits DUX4-induced muscle toxicity in vivo:  
346 implications for a targeted FSHD therapy. *Mol Ther.* 2012;20(7):1417-23.
- 347 20. Vasale J, Boyar F, Jocson M, Sulcova V, Chan P, Liaquat K, et al. Molecular  
348 combing compared to Southern blot for measuring D4Z4 contractions in  
349 FSHD. *Neuromuscul Disord.* 2015;25(12):945-51.
- 350 21. Morioka MS, Kitazume M, Osaki K, Wood J, Tanaka Y. Filling in the gap of  
351 human chromosome 4: single molecule real time sequencing of  
352 macrosatellite repeats in the facioscapulohumeral muscular dystrophy  
353 locus. *PLoS One.* 2016;11(3):e0151963.
- 354 22. Li H. Aligning sequence reads, clone sequences and assembly  
355 23. contigs with BWA-MEM. *arXiv.* 2013;arXiv:1303.3997.

356 24. Okonechnikov K, Golosova O, Fursov M, UGENE team. Unipro UGENE: a  
357 unified bioinformatics toolkit. *Bioinformatics*. 2012;28(8):1166-7.

358 25. Robinson JT, Thorvaldsdottir H, Winckler W, Guttman M, Lander ES, Getz  
359 G, et al. Integrative genomics viewer. *Nat Biotechnol*. 2011;29(1):24-6.

360

361

### 362 **Author Contributions**

363 SM and HM designed the study and collected experimental materials.

364 SM, SN, MU, HM, and TI analyzed and interpreted the data. SM drafted the  
365 original manuscript.

366

### 367 **Competing interests**

368 The authors report no disclosures relevant to the manuscript.

369

### 370 **Web Resources**

371 LAST: <http://last.cbrc.jp>

372 BWA: <http://bio-bwa.sourceforge.net>

373 Ape: <http://biologylabs.utah.edu/jorgensen/wayned/ape/>

374 UGENE: <http://ugene.net>

375 The URL for the human whole genome sequence data for NA12878 used in this  
376 study is as follows:

377 <https://github.com/nanopore-wgs-consortium/NA12878>

378

379



380 **Funding**

381 This study was supported by MEXT-Supported Program for the Strategic  
382 Research Foundation at Private Universities (to S.N. and M.T.U.). This work  
383 was supported by JSPS KAKENHI Grant Number JP15K19477 (to H.M).

384

385

386 **Figure legends**

387 Figure 1

388 (a) Vector map of RP11-242C23 generated using Ape software. EcoRI sites are  
389 shown. The D4Z4 array with 13 repeats and flanking regions was excised using  
390 EcoRI digestion, yielding a 49877-bp product. (b) Agarose gel electrophoresis  
391 of the EcoRI-digested vector DNA. Arrow shows the band of the 49877-bp D4Z4  
392 array.

393

394 Figure 2

395 Mapped reads were visualized using IGV software. Coverage of reads is shown  
396 on the upper part of the IGV image. Scheme shows the 13 D4Z4 repeats with  
397 flanking sequences. The bottom scheme shows the enlarged last D4Z4 repeat  
398 with the pLAM region (haplotype A). This region encodes pathogenic *DUX4*.

399

400 Figure 3

401 Nanopore sequence of the pLAM region. Exon 3 of *DUX4*, the 3' UTR of the  
402 gene, and polyA signal were determined with an accuracy of 100%. The upper  
403 sequence is the reference and the bottom shows the nanopore sequence.

404

405 Figure 4

406 The consensus sequence of the last D4Z4 repeat and pLAM region obtained by

407 whole human genome nanopore sequencing. The upper sequence is the

408 reference and the lower sequence is the publicly available rel4 data set.

# Figure 1

**a**

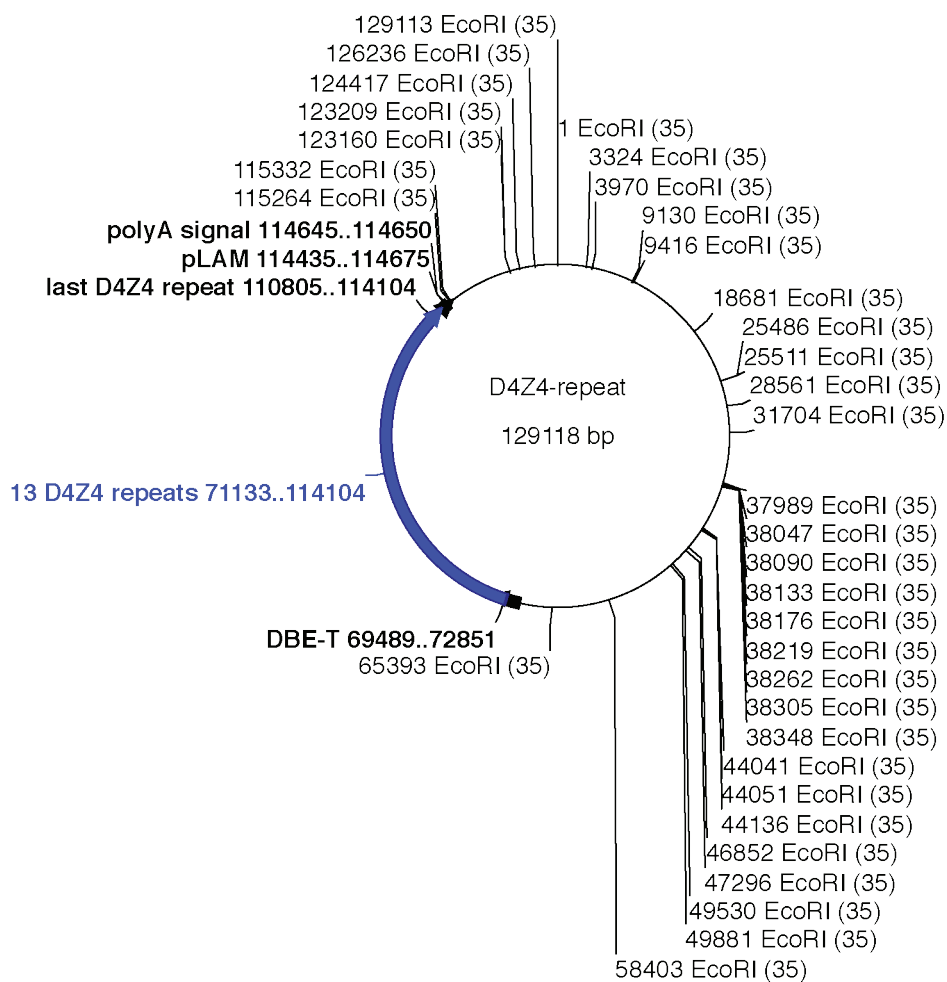

**b**

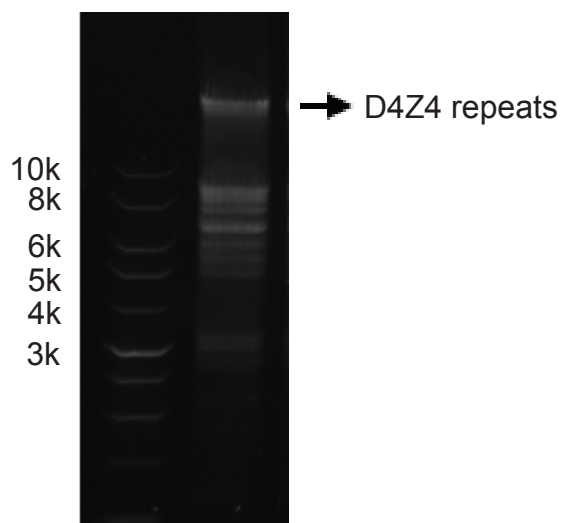

# Figure 2

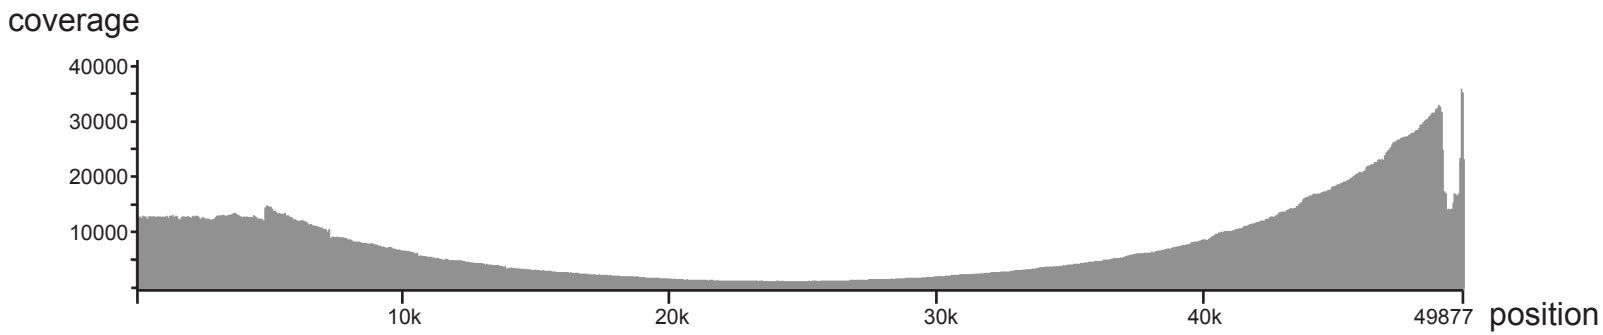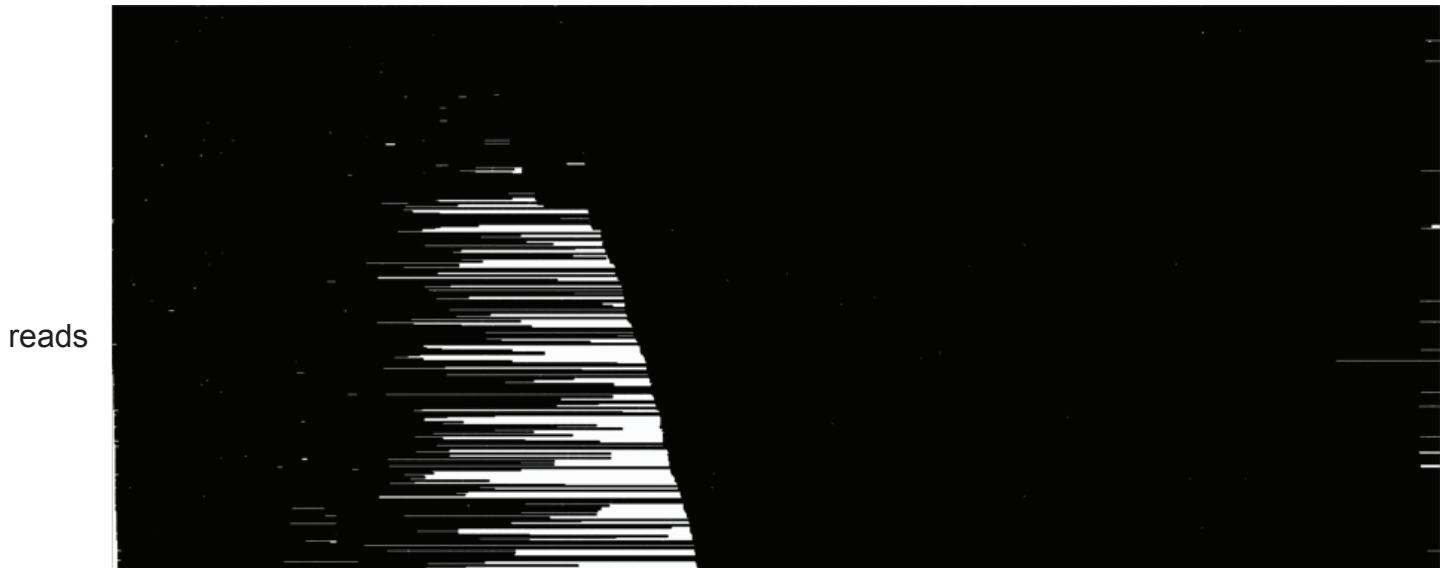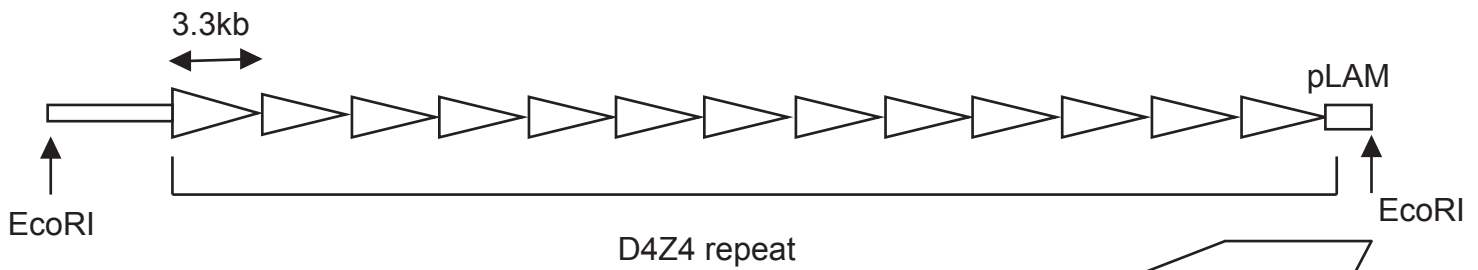

The last D4Z4 repeat

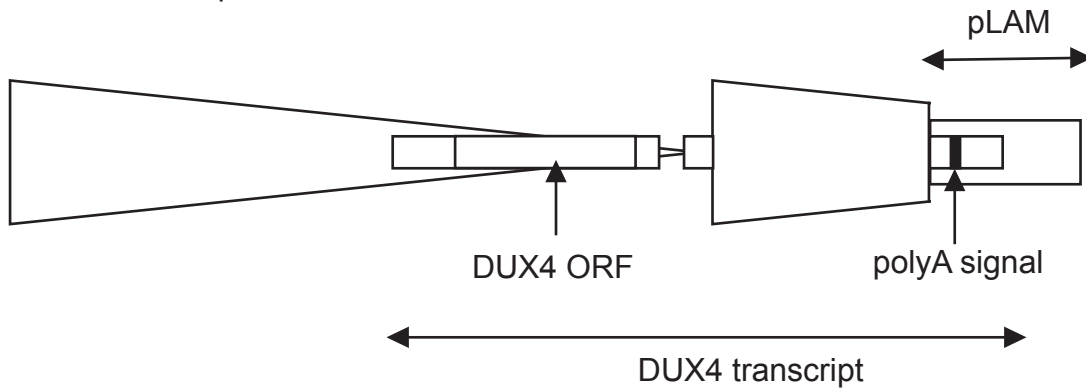

# Figure 3

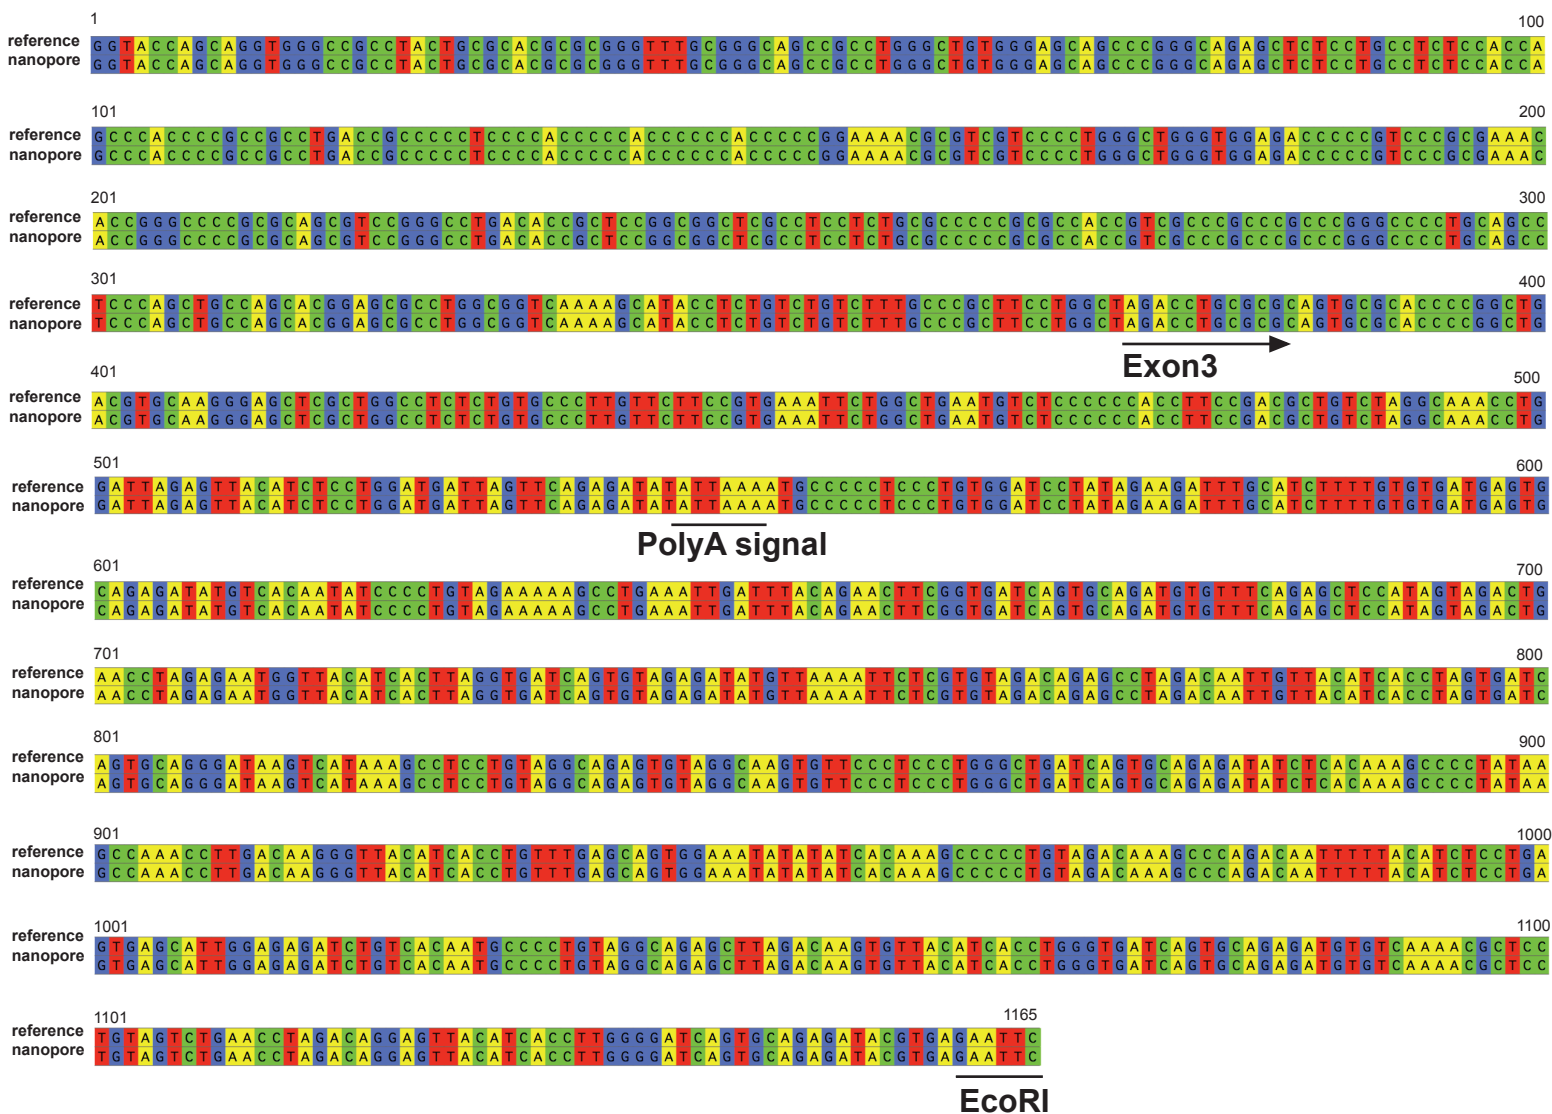

# Figure 4

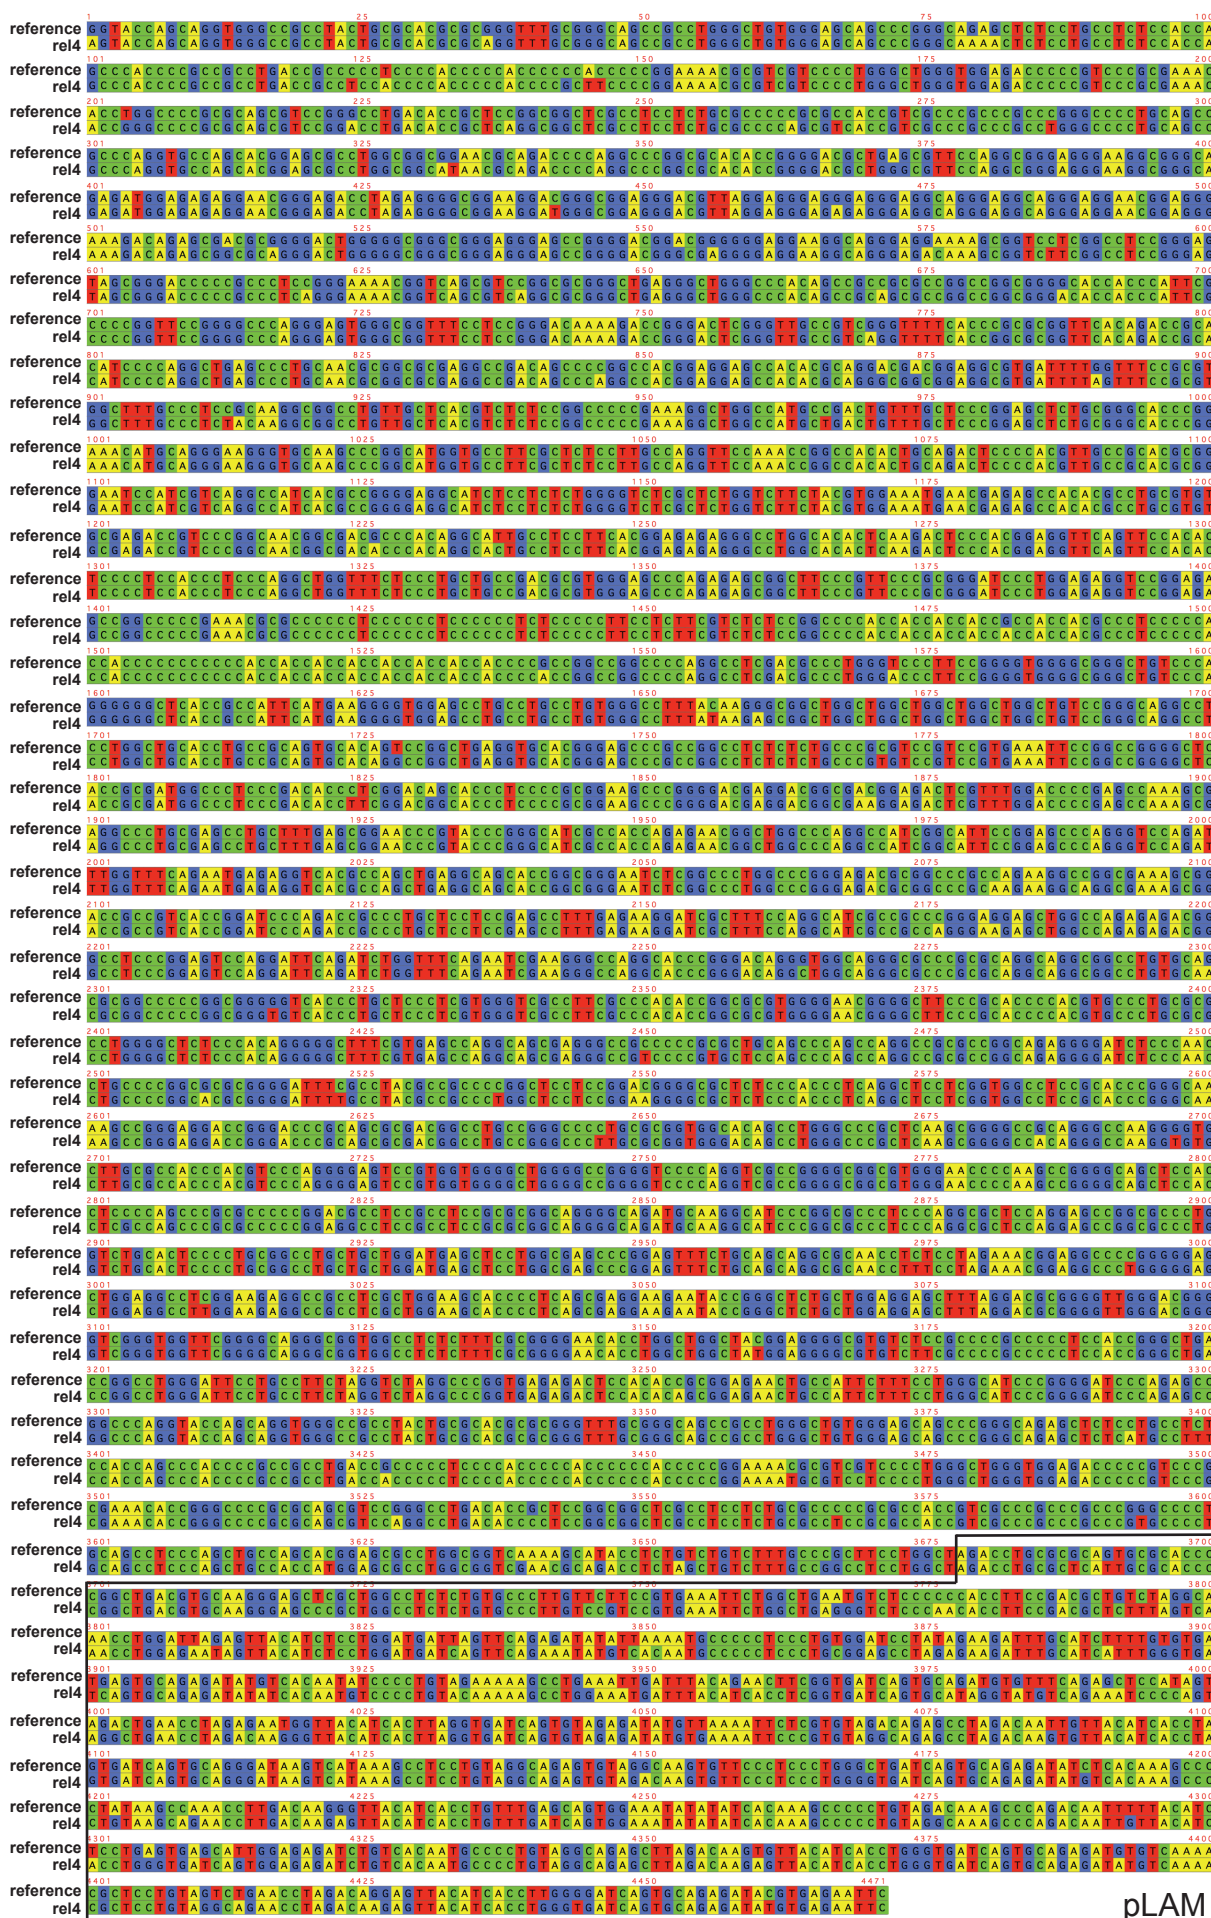

The last D4Z4

pLAM
